# Supplementary material
Source: PubMed Central journal article supplement (PMC2700051)
Supplement: NIHMS34901-supplement-01.pdf [file NIHMS34901-supplement-01.pdf]

---

**Supplementary Figure 1** Photographs of various crystals.

---

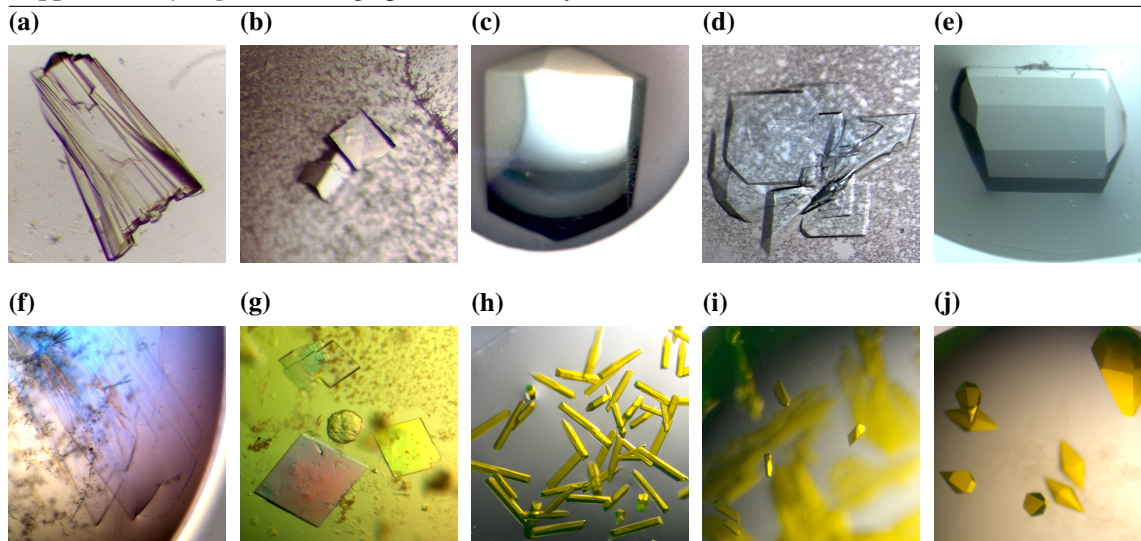

Conditions referred to by a label are given in Table 1 of the main text. **(a)** RLuc8:diammonium. **(b)** RLuc8:KSCN. **(c)** Protein: RLuc8 at 450 mg/ml, Mother Liquor: 0.3 M NaCl, 1.25 M diammonium phosphate, 0.1 M imidazole pH 8.0, Time: 8 months. Crystal was  $\sim 100 \mu\text{m}$  in size, and diffracted to  $1.6 \text{ \AA}$ . **(d)** S3RLuc8:thiomaltoside. **(e)** Protein: S3RLuc8 at 30 mg/ml, Mother Liquor: 0.5 M NaCl, 1.55 M diammonium phosphate, 0.1 M imidazole pH 8.0, Time: 4 months. **(f)** RLuc8/K25A/E277A:PEG/isopropanol. **(g)** RLuc8:PEG/isopropanol. **(h)** RrGFP:PEG/MPD. **(i)** Protein: RrGFP at 48 mg/ml, Mother Liquor: 0.1 M MES pH 6.5, 12% w/v PEG 20,000, Time: 30 min. **(j)** Protein: RrGFP at 48 mg/ml, Mother Liquor: 2.0 M ammonium sulfate, 5% v/v isopropanol, Time: 2 days. Cryoprotectant: mother liquor containing 35% MPD. These crystals are not optimal for diffraction, as the particularly long C axis of the crystal cell ( $\sim 250 \text{ \AA}$ ) would require a significant loss of diffraction resolution in order to keep the diffraction spots properly separated for the purposes of peak integration.

---

---

**Supplementary Figure 2** Linearity of the luciferase enzymatic reaction.

---

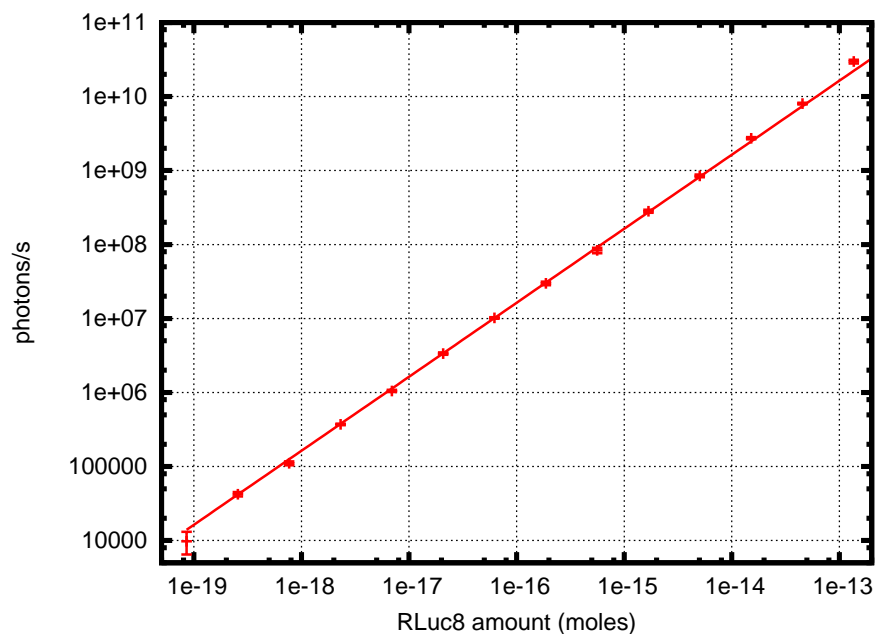

Serial 1:2 dilutions of RLuc8 were made in nickel affinity elution buffer (300 mM NaCl, 250 mM imidazole, 20 mM HEPES, pH 8) containing 1% human serum albumin as a carrier protein. The samples were then assayed in triplicate by adding 1  $\mu$ l of each sample to 100  $\mu$ l room temperature 100 mM sodium phosphate buffer (pH 7), adding 1  $\mu$ l of 0.5  $\mu$ g/ $\mu$ l coelenterazine, manually mixing, and measuring the average photons/s emitted over 10 s. Luminometer calibration was as previously described (Loening *et al.*, *Protein Eng. Des. Sel.* 19:391-400, 2006), and background luminescence was subtracted from the measured values. Error bars are SEM.

---

**Supplementary Table 1** Yield and specific activity of cytoplasmically expressed RLuc8 and the surface mutation constructs

| Protein                                   | Yield ( $\mu\text{g/ml}$ ) | Specific Activity (relative to RLuc) |
|-------------------------------------------|----------------------------|--------------------------------------|
| 1 RLuc8                                   | 528                        | 4.8                                  |
| 2 RLuc8/K12A/E106A                        | 392                        | 5.0                                  |
| 3 RLuc8/K25A/E277A                        | 312                        | 6.1                                  |
| 4 RLuc8/E183A/K227A                       | 418                        | 5.6                                  |
| 5 RLuc8/K12A/K25A/E106A/E277A             | 140                        | 4.0                                  |
| 6 RLuc8/K25A/E183A/K227A/E277A            | 40                         | 3.0                                  |
| 7 RLuc8/812A/E106A/E183A/K227A            | 232                        | 3.4                                  |
| 8 RLuc8/K12A/K25A/E106A/E183A/K227A/E277A | 20                         | 4.0                                  |

Yield represents  $\mu\text{g}$  of recovered protein per ml of culture. Specific activities were measured using coelenterazine, and are reported as relative to that of periplasmically expressed, C-terminal 6xHis tagged RLuc that has an activity of  $3.2 \times 10^{22}$  photons/s/mole enzyme (Loening *et al.*, *Protein Eng. Des. Sel.* 19:391-400, 2006).
